# Supplementary material for: Understanding activity and selectivity of metal-nitrogen-doped carbon catalysts for electrochemical reduction of CO2
Source: Nat Commun. 2017 Oct 16;8:944. doi: 10.1038/s41467-017-01035-z (PMC5643516; doi:10.1038/s41467-017-01035-z)
Supplement: Supplementary file 1 — Supplementary Information [file 41467_2017_1035_MOESM1_ESM.pdf]

## Supplementary Tables

**Supplementary Table 1.** Physical parameters of nitrogen-metal doped carbon (M-N-C) CO<sub>2</sub>RR electrocatalysts.

| ID     | $S_{\text{BET}}^{\text{a}}$<br>$\text{m}^2 \text{g}^{-1}$ | DL-Cap <sup>b</sup><br>$\text{mF cm}^{-2}$ | Overall metal by<br>ICP wt. % |                 | ID/IG <sup>e</sup> |
|--------|-----------------------------------------------------------|--------------------------------------------|-------------------------------|-----------------|--------------------|
|        |                                                           |                                            | Metal <sup>c</sup>            | Cu <sup>d</sup> |                    |
| Mn-N-C | 938                                                       | 87.82                                      | Mn: 0.44                      | 0.16            | 1.70               |
| Fe-N-C | 724                                                       | 66.94                                      | Ni: 2.88                      | 0.12            | 1.75               |
| Co-N-C | 758                                                       | 80.39                                      | Co: 1.11                      | 0.17            | 1.79               |
| Ni-N-C | 615                                                       | 38.82                                      | Fe: 1.73                      | 0.14            | 1.83               |
| Cu-N-C | 807                                                       | 74.38                                      | -                             | 1.11            | 1.80               |

a)  $S_{\text{BET}}$ : N<sub>2</sub> ad/desorption-based surface area; b) Double layer capacity values (Geometric area of each electrode is 1 cm<sup>2</sup> with 0.76 mg cm<sup>-2</sup> catalyst loading); c,d) overall metal content determined from ICP-OES measurement. Notably, the detection limit of ICP-OES is as low as 0.1, 0.25, 0.4, 0.5 and 0.1 µg/L for Fe, Co, Cu, Ni and Mn, respectively, where the measured solution of the dissolved M-N-C sample is 5000, 1400, 900, 1700 and 1300 times higher than the limit, indicating a low uncertainty. Each sample is measured twice. The value in the table is the average. e) ID/IG peak ratio: Ratio of D band to G band based on the Raman spectra through peak fitting with mixed-type Lorentzian/Gaussian fit functions. See Supplementary Figure 4 for the experimental Raman spectra as well as Supplementary Table 2 for the fitting detail.

**Supplementary Table 2.** Fitting details of Raman spectra for this family of M-N-C electrocatalysis.

| ID     | Curve name | Center  | Width   | Height  | % Gaussian | Type  | Area     | Peak height          | Area                 | All area I(D)/I(G) |
|--------|------------|---------|---------|---------|------------|-------|----------|----------------------|----------------------|--------------------|
| Cu-N-C | D2         | 1170    | 238.749 | 548.914 | 100.00     | Mixed | 1.40+E5  | I(D1)/I(G1):<br>2.13 | I(D1)/I(G1):<br>6.90 | 1.80               |
|        | D1         | 1353.87 | 219.245 | 4302.14 | 47.9629    | Mixed | 1.25+E5  | I(D2)/I(G2):<br>0.19 | I(D2)/I(G2):<br>0.24 |                    |
|        | G2         | 1548.15 | 166.307 | 2828.96 | 61.3572    | Mixed | 5.93+E5  | I(G2)/I(G1):<br>1.40 | I(G2)/I(G1):<br>3.27 |                    |
|        | G1         | 1598.05 | 77.7354 | 2015.82 | 81.5916    | Mixed | 1.81+E5  |                      |                      |                    |
| Co-N-C | D2         | 1170    | 196.548 | 569.691 | 100.00     | Mixed | 1.19E+05 | I(D1)/I(G1):<br>1.48 | I(D1)/I(G1):<br>4.05 | 1.79               |
|        | D1         | 1348.52 | 226.881 | 4939.44 | 53.3781    | Mixed | 1.46E+06 | I(D2)/I(G2):<br>0.22 | I(D2)/I(G2):<br>0.25 |                    |
|        | G2         | 1536.86 | 157.42  | 2767.23 | 68.2247    | Mixed | 5.34E+05 | I(G2)/I(G1):<br>0.81 | I(G2)/I(G1):<br>1.47 |                    |
|        | G1         | 1598.81 | 90.6636 | 2743.43 | 68.4198    | Mixed | 3.05E+05 |                      |                      |                    |
| Ni-N-C | D2         | 1170    | 158.217 | 189.839 | 99.4851    | Mixed | 3.21E+04 | I(D1)/I(G1):<br>1.48 | I(D1)/I(G1):<br>3.73 | 1.75               |
|        | D1         | 1350.86 | 198.226 | 1434.15 | 71.0305    | Mixed | 3.44E+05 | I(D2)/I(G2):<br>0.24 | I(D2)/I(G2):<br>0.26 |                    |
|        | G2         | 1540.75 | 147.152 | 783.559 | 100.00     | Mixed | 1.23E+05 | I(G2)/I(G1):<br>0.81 | I(G2)/I(G1):<br>1.33 |                    |
|        | G1         | 1597.85 | 76.094  | 970.745 | 63.685     | Mixed | 9.22E+04 |                      |                      |                    |

|        |    |         |         |         |        |       |          |                      |                      |      |
|--------|----|---------|---------|---------|--------|-------|----------|----------------------|----------------------|------|
| Fe-N-C | D2 | 1170    | 153.925 | 163.78  | 100.00 | Mixed | 2.68E+04 | I(D1)/I(G1):<br>1.58 | I(D1)/I(G1):<br>5.20 | 1.83 |
|        | D1 | 1348.91 | 188.192 | 1631.51 | 53.16  | Mixed | 4.00E+05 | I(D2)/I(G2):<br>0.18 | I(D2)/I(G2):<br>0.17 |      |
|        | G2 | 1549.09 | 153.762 | 923.131 | 92.93  | Mixed | 1.56E+05 | I(G2)/I(G1):<br>0.89 | I(G2)/I(G1):<br>2.03 |      |
|        | G1 | 1598.56 | 66.255  | 1034.39 | 88.66  | Mixed | 7.69E+04 |                      |                      |      |
| Mn-N-C | D2 | 1170    | 203.708 | 578.058 | 64.01  | Mixed | 1.47E+05 | I(D1)/I(G1):<br>1.57 | I(D1)/I(G1):<br>5.40 | 1.70 |
|        | D1 | 1348.46 | 193.130 | 5042.11 | 41.72  | Mixed | 1.32E+06 | I(D2)/I(G2):<br>0.19 | I(D2)/I(G2):<br>0.24 |      |
|        | G2 | 1549.16 | 163.501 | 3009.19 | 62.10  | Mixed | 6.18E+05 | I(G2)/I(G1):<br>0.94 | I(G2)/I(G1):<br>2.52 |      |
|        | G1 | 1597.1  | 64.802  | 3210.22 | 77.57  | Mixed | 2.45E+05 |                      |                      |      |

**Supplementary Table 3.** Metal atom, nitrogen content and assignment of the different N species in the M-N-C CO<sub>2</sub>RR electrocatalysts extracted from XPS data. Total metal and nitrogen content are calculated from measured XP spectra areas using instrument-specific relative sensitivity factors provided by manufacturer (SPECS).

| Sample | Metal <sup>a</sup><br>atom % | Nitrogen <sup>a</sup><br>atom% | Fitting of Nitrogen moieties / atom% |           |          |           |     |                   |
|--------|------------------------------|--------------------------------|--------------------------------------|-----------|----------|-----------|-----|-------------------|
|        |                              |                                | M-N                                  | Pyridinic | Pyrrolic | Graphitic | N-O | CH-O <sub>x</sub> |
| Mn-N-C | <b>Mn:</b> 0.2               | 8.2                            | <b>12.2</b>                          | 25.8      | 43.9     | 10.3      | 5.0 | 2.8               |
| Fe-N-C | <b>Fe:</b> 0.3               | 8.2                            | <b>10.4</b>                          | 24.2      | 44.6     | 11.7      | 6.0 | 3.1               |
| Co-N-C | <b>Co:</b> 0.4               | 10.5                           | <b>13.4</b>                          | 28.1      | 41.6     | 9.8       | 4.4 | 2.7               |
| Ni-N-C | <b>Ni:</b> 0.7               | 9.5                            | <b>20.2</b>                          | 17.1      | 43.6     | 10.7      | 5.3 | 3.2               |
| Cu-N-C | <b>Cu:</b> 0.8               | 14.6                           | <b>15.5</b>                          | 30.4      | 32.9     | 7.0       | 3.9 | 10.3              |

## Supplementary Note

**Detailed analysis of the metal core-level spectra.** Better understanding of the type of metallic species present in these samples can be obtained by a detailed analysis of the corresponding  $2p_{3/2}$  photoemission lines, shown as insets in **Figure 2**. Due to the low metal loading in our samples, we cannot fit the data with the multiplet splitting features typical for oxides and hydroxides.<sup>1</sup> Instead, in order to gain insight into whether oxidized metal species or nitrogen-ligated metals prevail in our samples we have compared the main  $2p_{3/2}$  photoemission peak positions with data reported for divalent metal species and metalloporphyrins, and a ratio of its area to the area of the shake-up satellites, which serves as a fingerprint of 3d metals in 2+ state. Muralidharan and Hayes have reported shake-up structures for Co(II), Ni(II) and Cu(II) porphyrins to be significantly weaker than the corresponding satellites of simple oxides of the same elements.<sup>2</sup> Thus, Ni(II) porphyrin exhibits an XP spectrum with  $2p_{3/2}$  peak centered at 854.8 eV, which is similar to Ni(OH)<sub>2</sub>, but unlike the latter it has a shake-up structure of only 11% intensity as compared to the main line. In fact, the Ni-N-C sample in our study has the main Ni  $2p_{3/2}$  photoemission peak at 854.9 eV and a shake-up peak just 18% of its area, suggesting a dominant presence of Ni bound to nitrogen in our samples. In contrast, the Co-N-C sample displayed a significantly more intensive shake-up structure, ca. 20% of the main Co  $2p_{3/2}$  peak area, which is considerably higher than a value reported for Co(II) porphyrin (6.5%), but also clearly lower than CoO and Co(OH)<sub>2</sub> (38% and 54% correspondingly). Mn  $2p_{3/2}$  of Mn-N-C has its maximum at 641.7 eV, similar to MnO, and lower than compounds with Mn<sup>3+</sup> and higher oxidation states.<sup>3</sup> At the same time, the shake-up structure is as high as 11% of the main photoemission peak, which is slightly higher than the one reported for MnO (9%). Unfortunately, there is no reliable XPS reference for the manganese porphyrin structure. One can speculate however that Mn-N-C clearly contains divalent Mn species with a ligand structure different from common Mn<sup>2+</sup> compounds. The Cu 2p XP spectrum (Supplementary Figure 8a) shows a clear presence of divalent copper, as evident from the well-developed shake-up. Cu  $2p_{3/2}$  XP spectrum shows two sharp peaks at 932.7 and 934.8 eV and a shake-up satellite structure between 938.4 and 947.3 eV. A binding energy of 934.8 eV is similar to the value reported by Biesinger at al<sup>1</sup> for Cu(OH)<sub>2</sub>, but also to Cu porphyrin.<sup>2,3</sup> The observed intensity of the shake-up satellite structure is 59% of the main line, which is only slightly higher than the 53% for both, Cu-porphine<sup>2</sup> and Cu(OH)<sub>2</sub> reported by Biesinger<sup>1</sup>. The peak at 932.7 eV can be assigned either to metallic copper or to Cu<sub>2</sub>O, however a detailed analysis is not possible due to weak CuLMM Auger line.<sup>1</sup> It appears however reasonable to assign this peak to the Cu<sup>+</sup> state, since metallic copper in the near-surface region is unlikely to remain after multiple acid treatments. The Fe  $2p_{3/2}$  spectrum of the Fe-N-C sample shows a broad peak at 710.8 eV with a shoulder at ca. 708 eV. The position of the former and absence of distinct satellite structure points out the presence of significant amount of Fe<sub>2</sub>O<sub>3</sub>, while the latter is in an agreement with the values reported earlier for iron phthalocyanine.<sup>4</sup> According to Fe  $2p_{3/2}$  XP spectrum deconvolution, the nitrogen-coordinated iron comprises only 1.6% of the total Fe content observed by XPS.

## Supplementary Figures

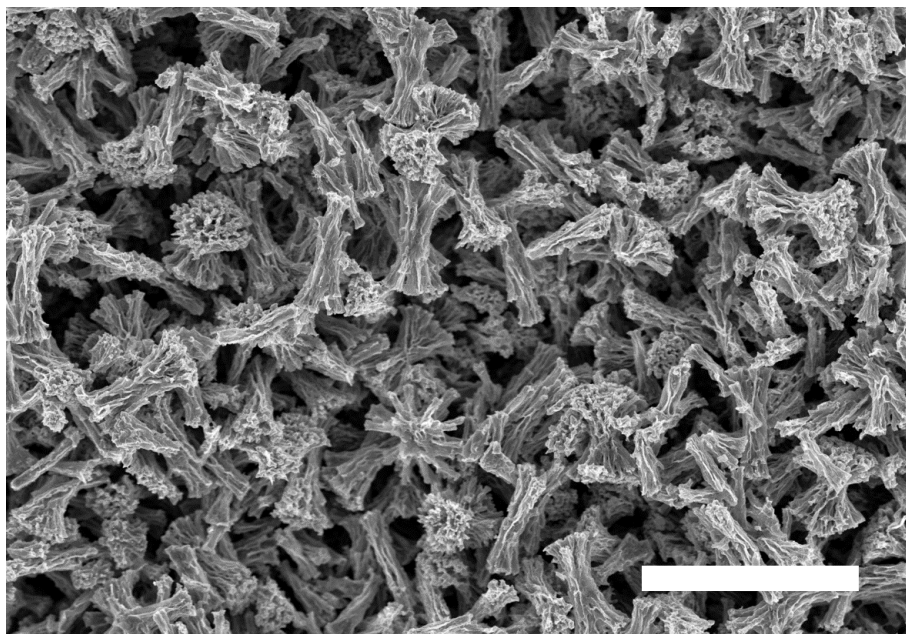

**Supplementary Figure 1.** Typical Scanning Electron Microscopy image of the M-N-C electrocatalysts. Scale bar: 10  $\mu\text{m}$ .

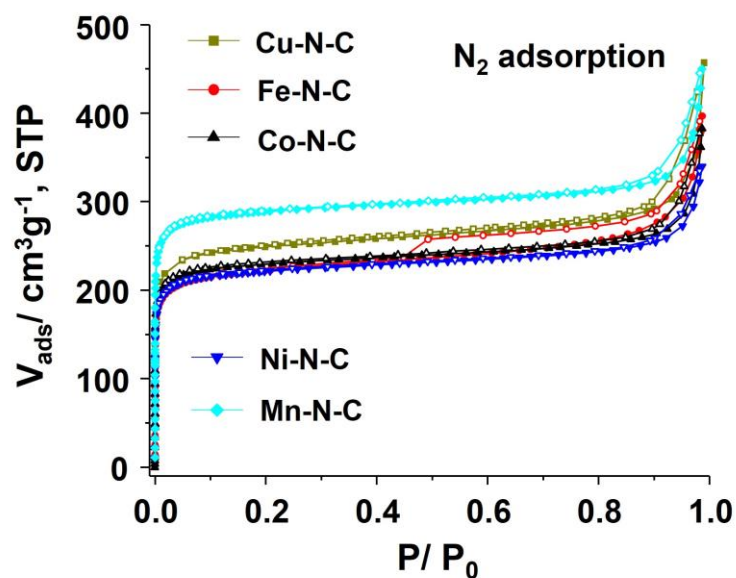

**Supplementary Figure 2.**  $\text{N}_2$  physisorption isotherms for this family of M-N-C electrocatalysts. As shown, the isotherms are type I indicating the microporous structures; the abrupt increase in the higher pressure regime indicating the existence of macropores. In short, these information confirms the rich of microporosity, and indicates the hierarchical structure.

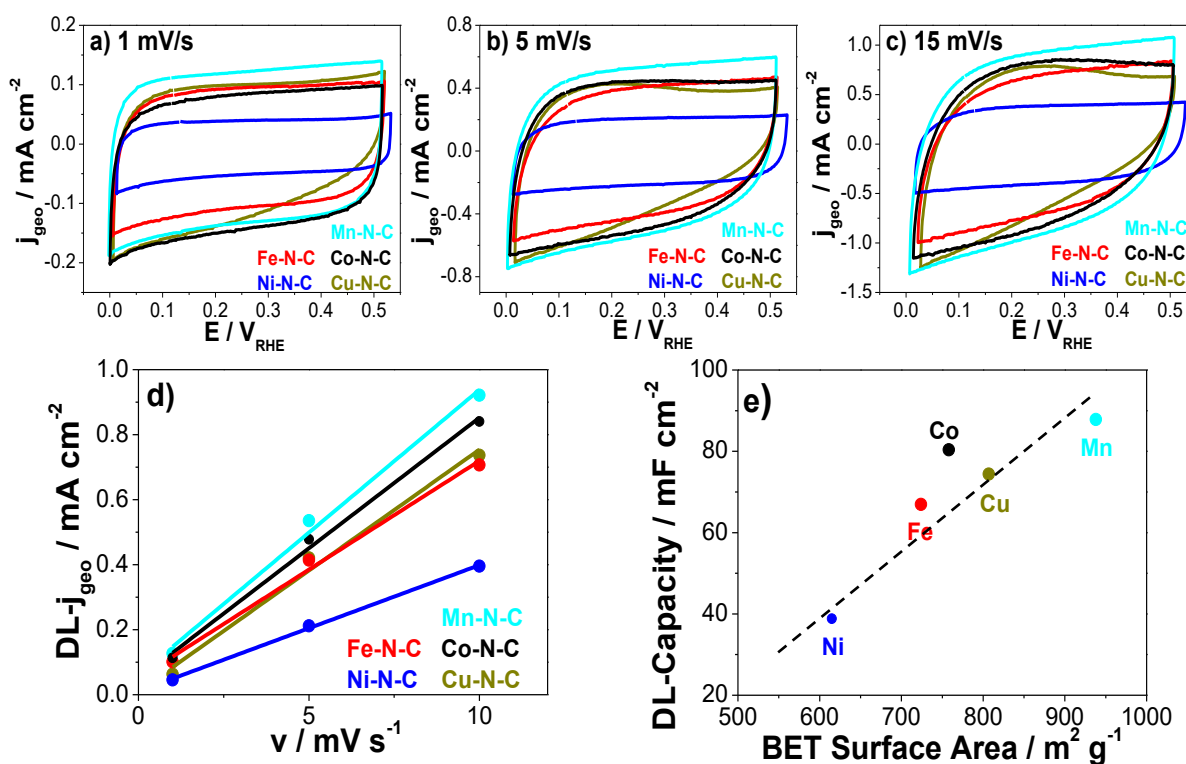

**Supplementary Figure 3.** a) - c) Cyclic voltammetry of the five M-N-C catalysts conducted in CO<sub>2</sub>-saturated 0.1 M KHCO<sub>3</sub> at various scan rates for estimation of double layer (DL) capacity; d) current densities from a-c plotted vs. electrode potential scan rate to extract the double layer capacity; e) Correlation of double layer capacity and the N<sub>2</sub> adsorption derived BET surface area. Cycle voltammetry was performed between 0.0 and 0.52 V vs. RHE to avoid the interference of the faradaic process. Double layer current densities are utilized to determine the double layer capacity, which is proportional to the double-layer interfacial area.

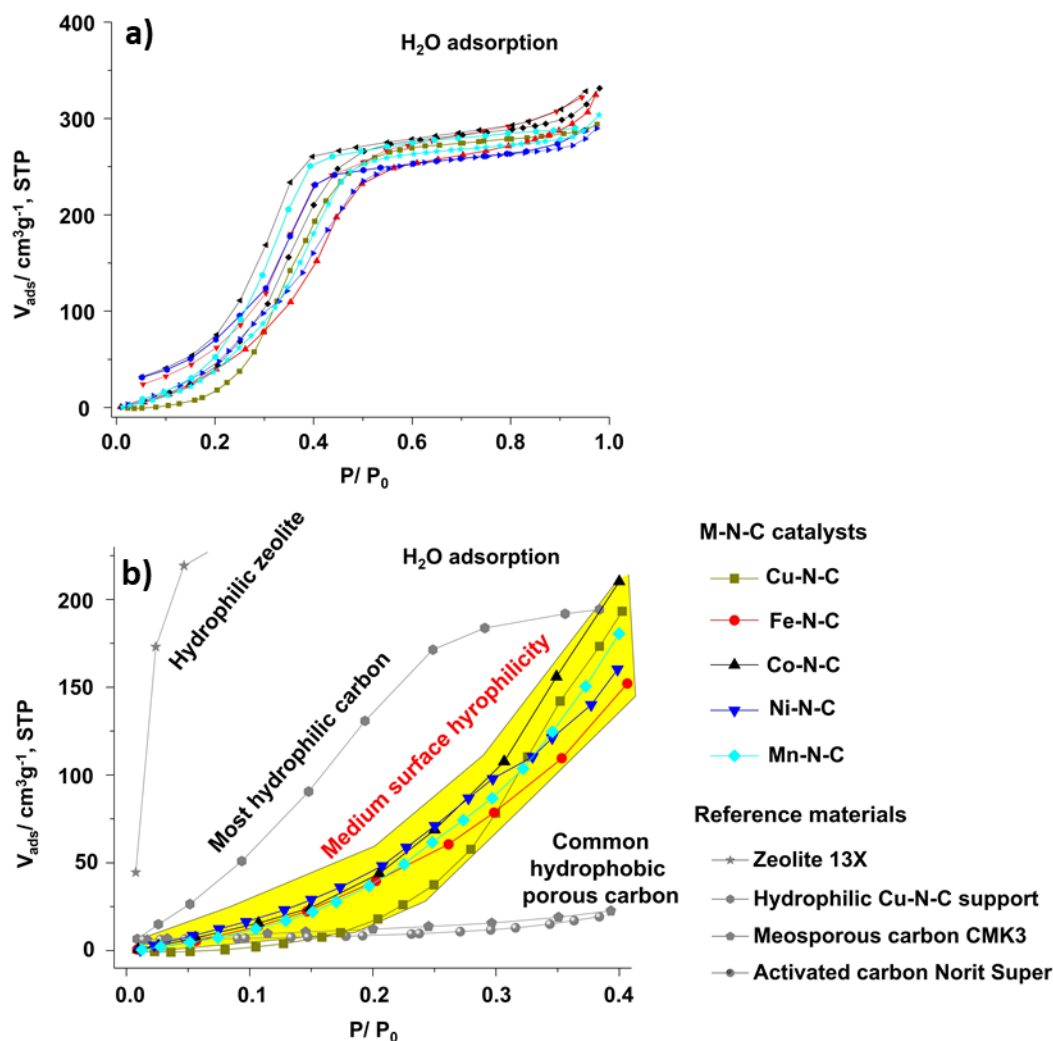

**Supplementary Figure 4.** a) Water vapor adsorption isotherms for this family of M-N-C electrocatalysts. b) Water vapor adsorption isotherms with highlighted low pressure regime together with typical benchmark samples, including hydrophilic zeolite 13X, most hydrophilic carbon as well as porous carbons (mesoporous CMK-3, commercial activated carbon Norit Super) that commonly show hydrophobic nature. As shown, the surface of this family of M-N-C is medium hydrophilic or hydrophobic as compared with the typical benchmark materials.

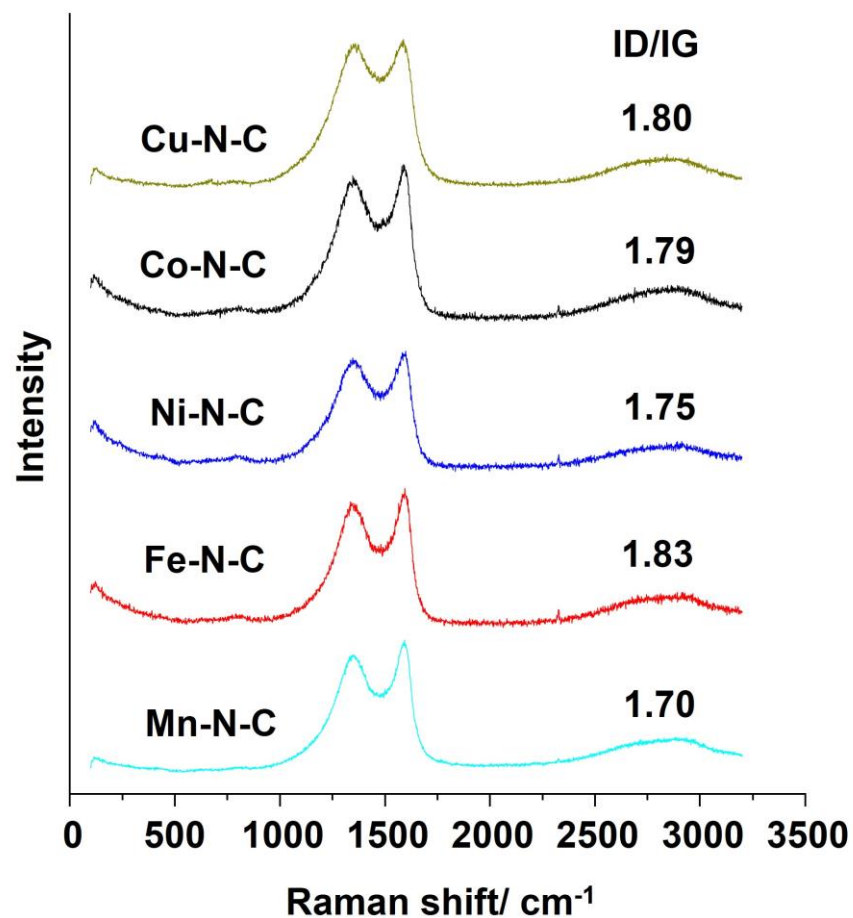

**Supplementary Figure 5.** Raman spectra of this family of M-N-C electrocatalysts. ID/IG ratio is based on peak fitting as shown in Table S2. As shown, the ratio is very close from one to another, indicating the density of defect sites of M-N-C is very similar.

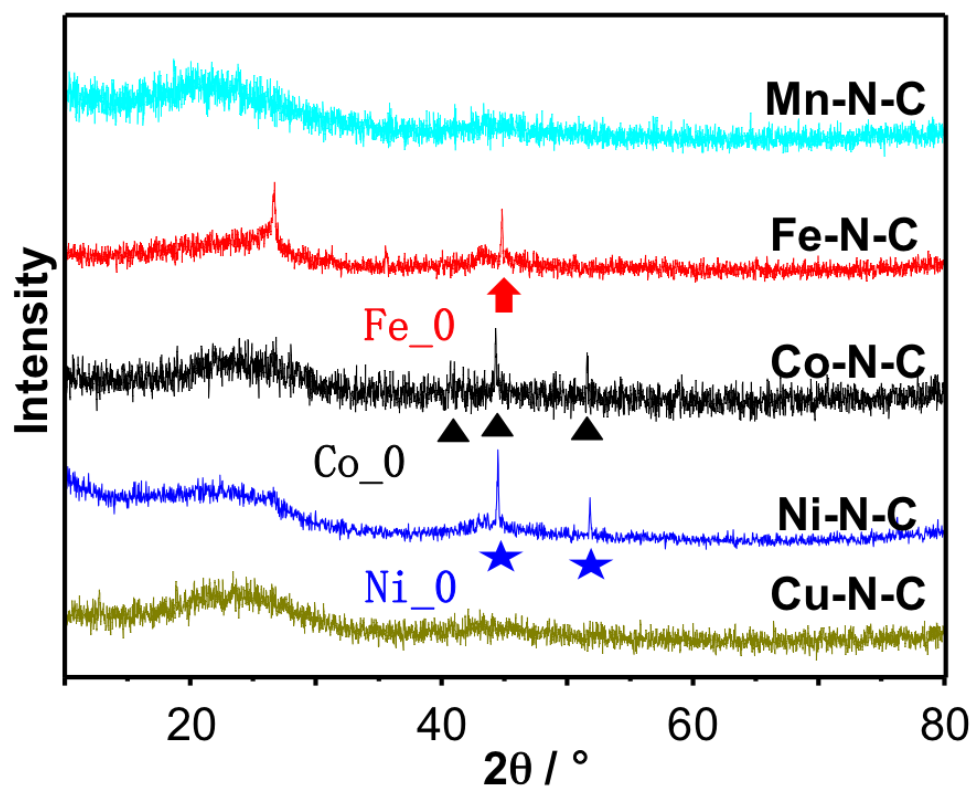

**Supplementary Figure 6.** XRD patterns of this family of M-N-C catalysts.

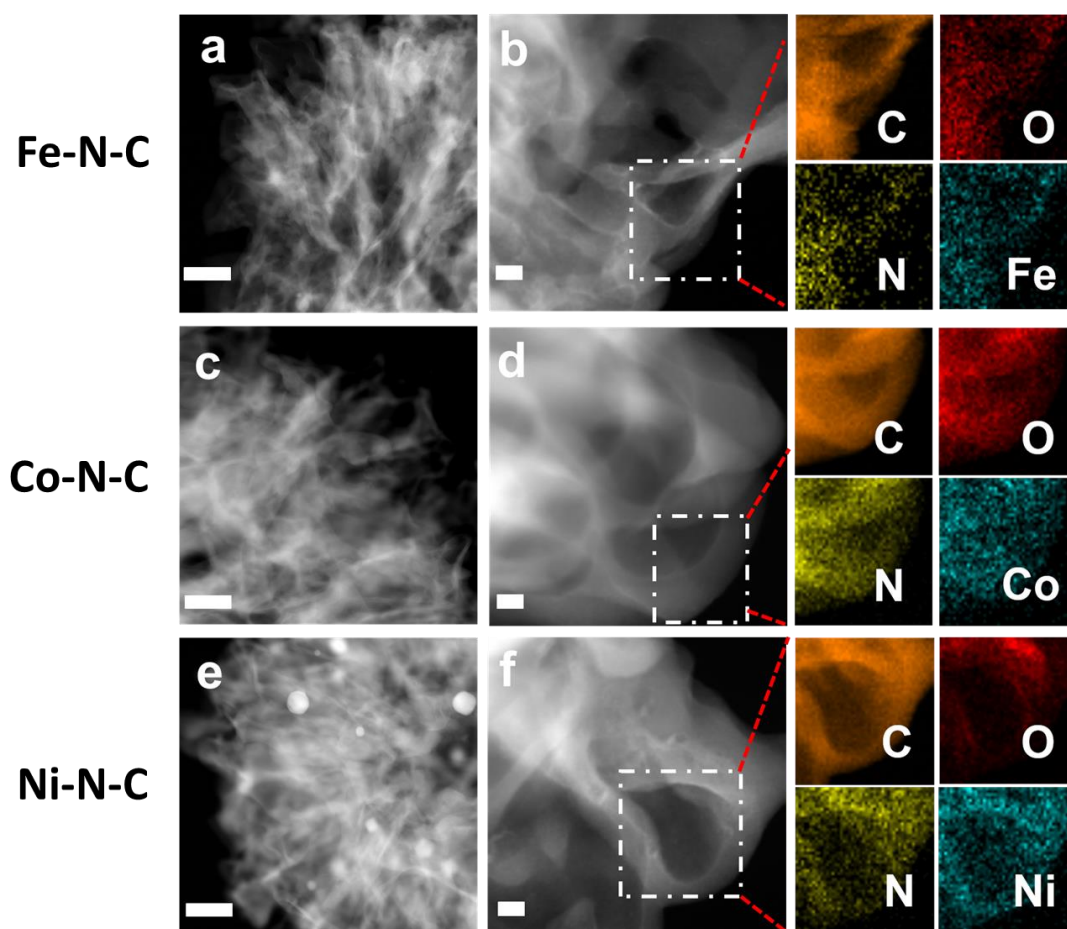

**Supplementary Figure 7.** STEM images and elemental maps for a,b) Fe-N-C, c,d) Co-N-C and e,f) Ni-N-C; Scale bar in left a,c,e) column: 200 nm, middle b,d,f)column: 20 nm.

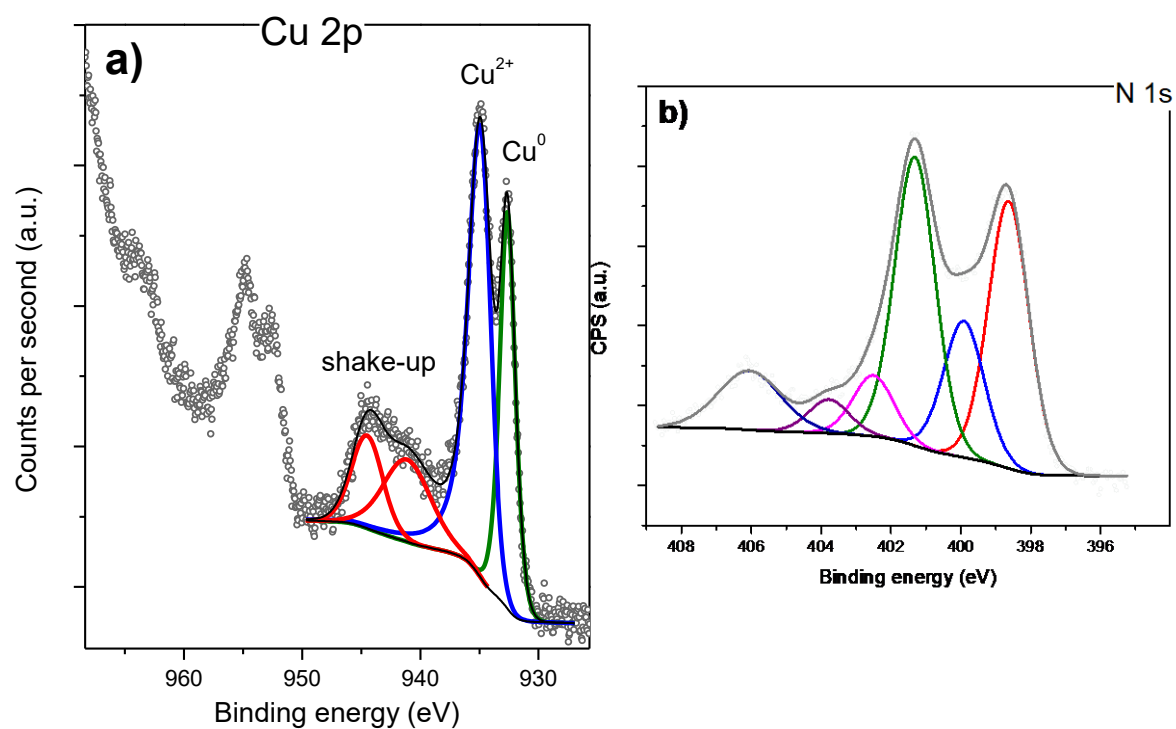

**Supplementary Figure 8.** High-resolution Cu 2p (a) and N 1s (b) XPS spectra of the Cu-N-C sample. See main text for N 1s peak assignment.

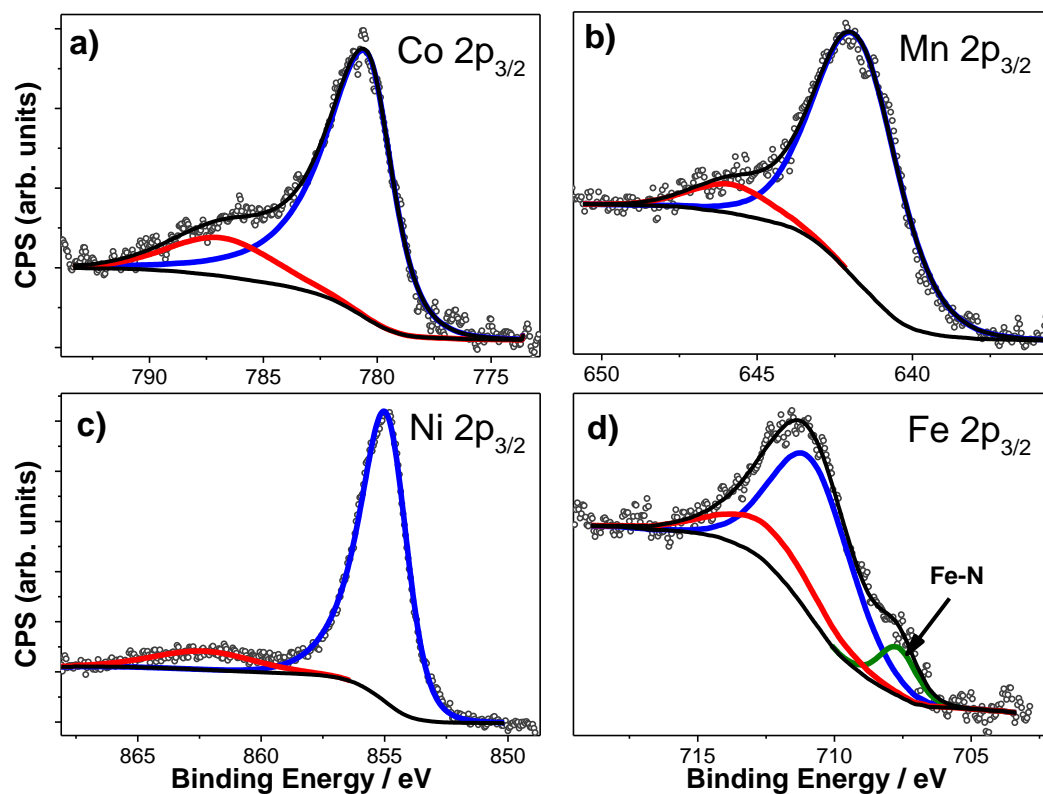

**Supplementary Figure 9.** High-resolution metal 2p<sub>3/2</sub> of Co-N-C (a), Mn-N-C (b), Ni-N-C (c) and Fe-N-C (d). Blue lines represent 2p<sub>3/2</sub> main peaks, red – the corresponding shake-up satellites.

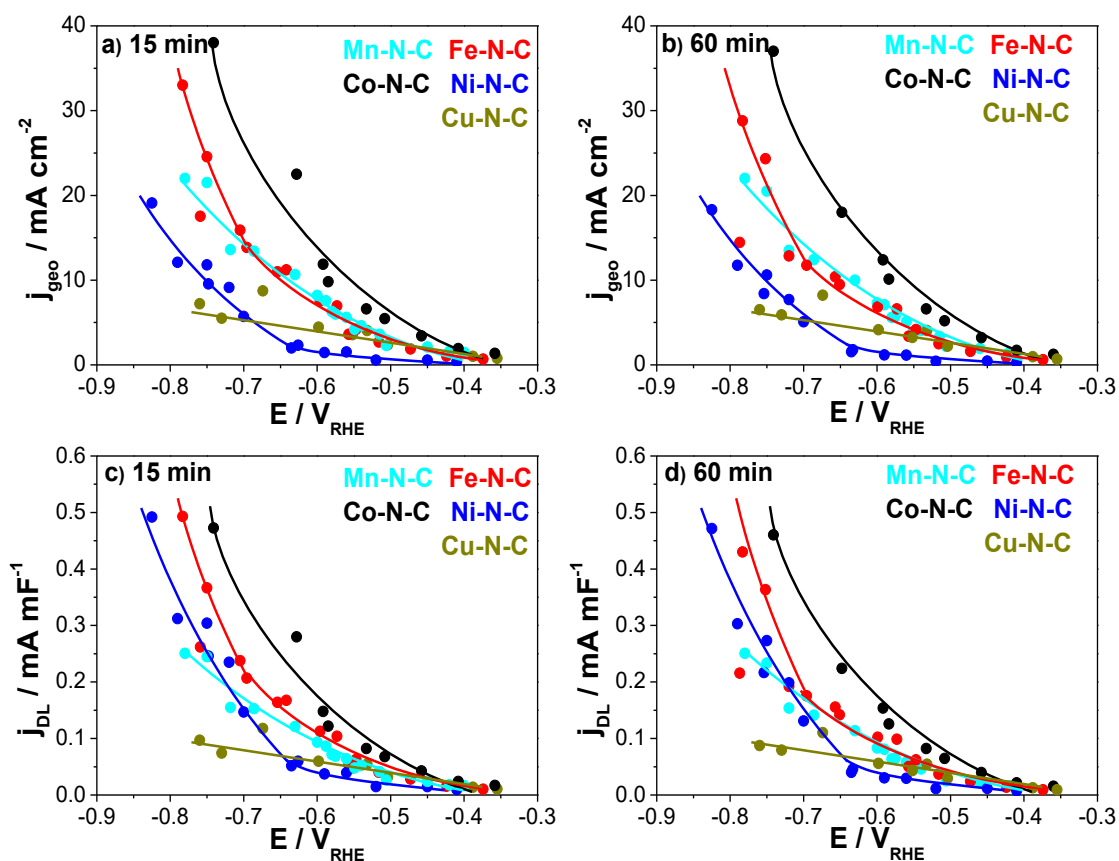

**Supplementary Figure 10.** Stationary potentiostatic catalytic activity of Cu-N-C (grey), Fe-N-C (red), Ni-N-C (blue), Mn-N-C (cyan) and Co-N-C (black) catalysts during bulk CO<sub>2</sub> electrolysis. Geometric current densities at a) 15 min b) 60min. Double layer capacity normalized stationary current densities: c) 15 min d) 60 min. Lines to guide the eye. Conditions: CO<sub>2</sub>-saturated 0.1 M KHCO<sub>3</sub>, 0.76 mg cm<sup>-2</sup> catalyst loading

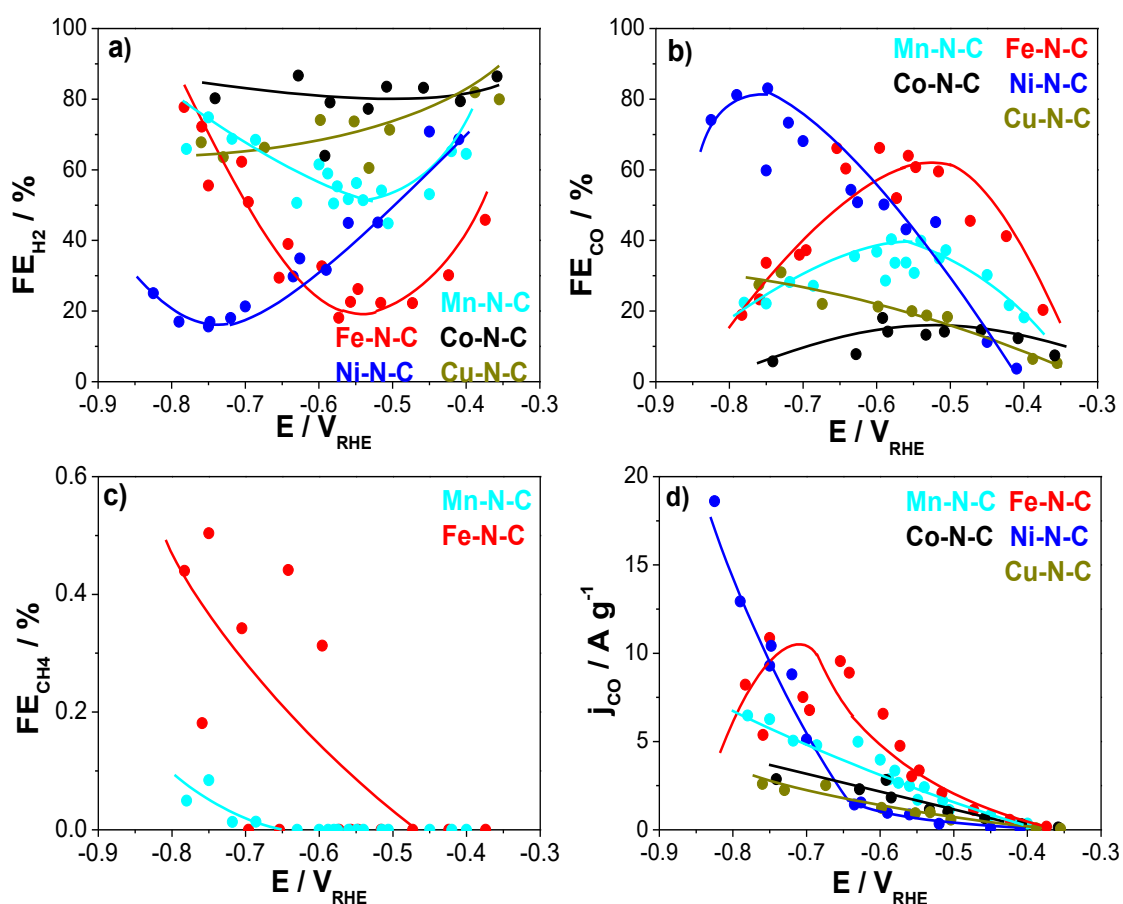

**Supplementary Figure 11.** Product efficiencies and yields. CO a) Faradaic efficiency and Absolute value of geometric reduction current density during bulk CO<sub>2</sub> electrolysis on Cu-N-C (grey), Fe-N-C (red), Ni-N-C (blue), Mn-N-C (cyan) and Co-N-C (black). Lines to guide the eye. Conditions: 15 min at constant electrode potential in CO<sub>2</sub>-saturated 0.1 M KHCO<sub>3</sub> at 0.76 mg cm<sup>-2</sup> catalyst loading.

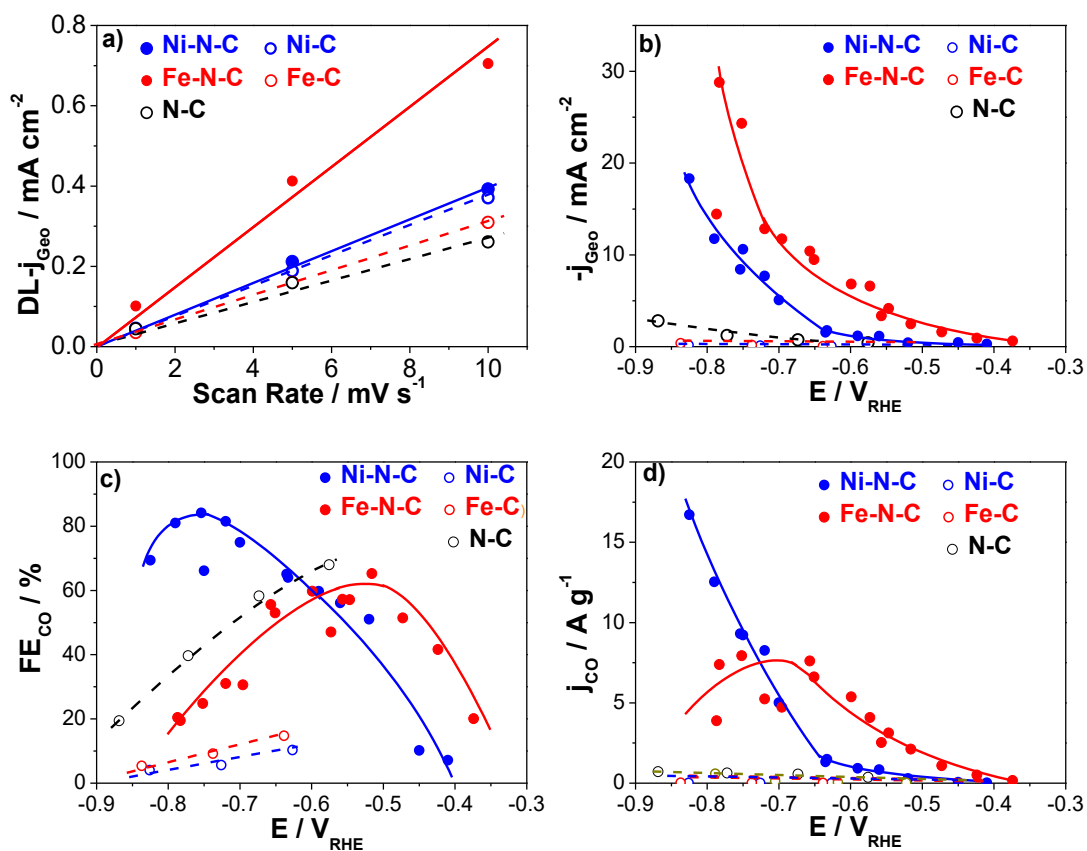

**Supplementary Figure SI 12.** Catalytic performance of Ni-N-C, Ni-C, Fe-N-C, Fe-C and N-C for CO<sub>2</sub>RR in 0.1 M CO<sub>2</sub> saturated KHCO<sub>3</sub> electrolyte, a) Double layer capacity, b) Absolute total geometric current density, c) Faradaic Efficiency towards CO and d) Mass normalized CO partial current density at 60 min of CO<sub>2</sub> bulk electrolysis. Guide for the eye lines are shown. Catalyst loading: 0.76 mg cm<sup>-2</sup>.

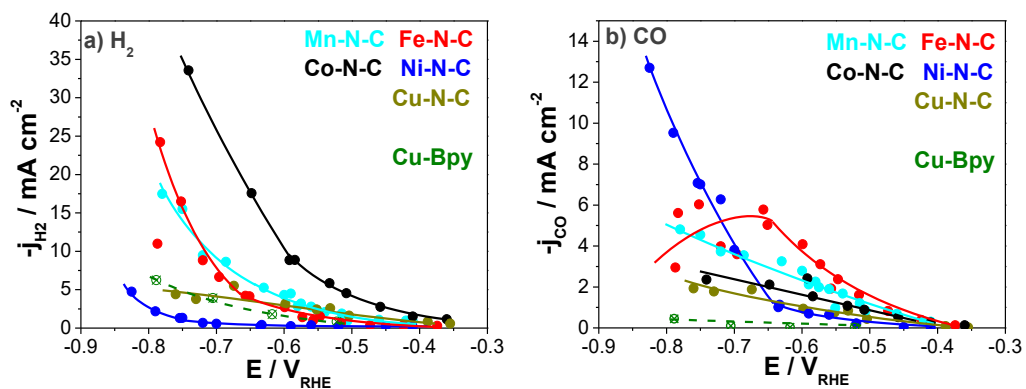

**Supplementary Figure 13.** Catalytic performance of Mn-N-C, Fe-N-C, Co-N-C, Ni-N-C, Cu-N-C and Cu-Bpy for CO<sub>2</sub>RR in 0.1 M CO<sub>2</sub> saturated KHCO<sub>3</sub> electrolyte. Geometric partial current density for a) H<sub>2</sub> and b) CO at 60 min of CO<sub>2</sub> bulk electrolysis. Lines to guide the eye. Catalyst loading: 0.76 mg cm<sup>-2</sup>.

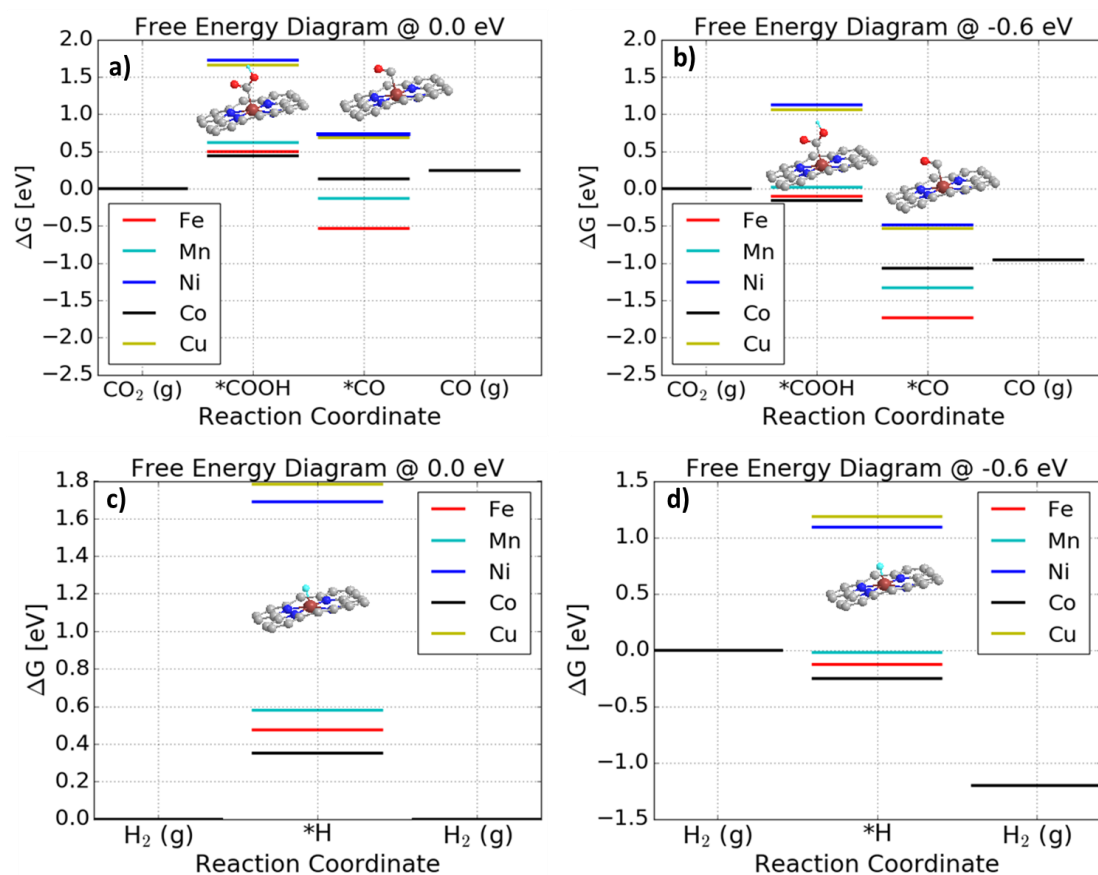

**Supplementary Figure 14.** DFT-calculated free energy diagram for the CO<sub>2</sub> reduction reaction (CO<sub>2</sub>RR) (a,b) and hydrogen evolution reaction (HER) (c,d) at 0 V<sub>RHE</sub> (a,c) and -0.6 V<sub>RHE</sub> (b,d).

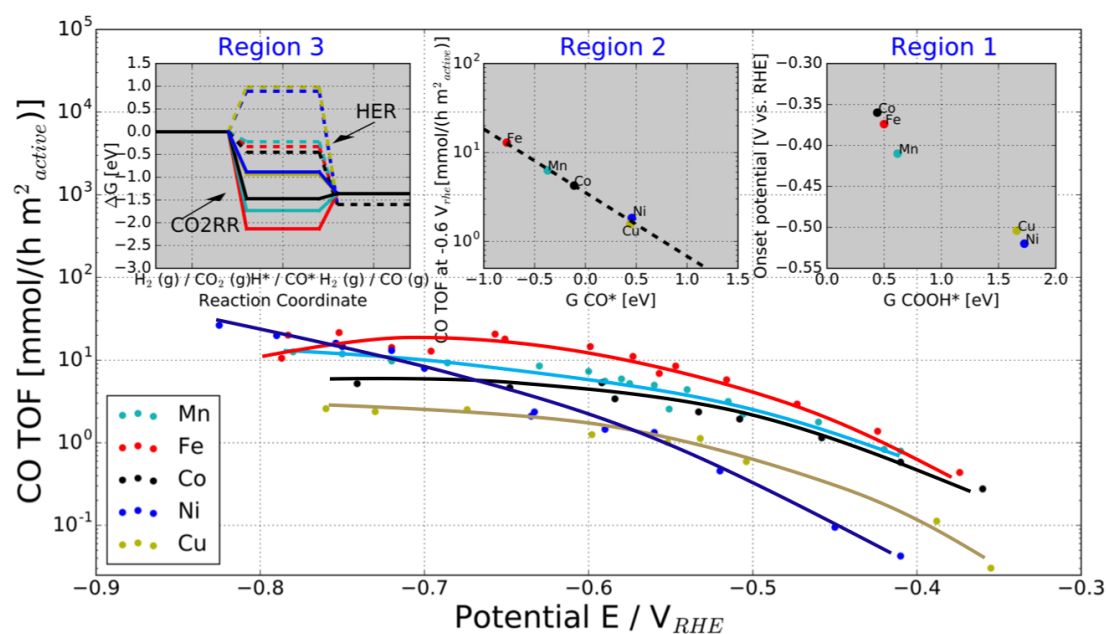

**Supplementary Figure 15.** Experimental CO production turnover frequency (TOF) of the M-N-C catalysts versus applied IR-corrected electrode potential (see Supplementary Equation 3). The catalytic reactivity trends split into 3 potential regions with distinctly different rate-determining mechanistic features. Insets: Region 1: Low overpotentials, the experimental onset potential of CO production correlates with the binding energy of the reaction intermediate  $\text{COOH}^*$ . Region 2: Intermediate over-potentials, CO production TOF at  $-0.6 V_{\text{RHE}}$  vs. free energy of adsorbed  $\text{CO}$ ,  $\text{CO}^*$ ; Region 3: High overpotentials, free energy diagrams for the HER (dashed paths) and  $\text{CO}_2\text{RR}$  (solid paths) at  $-0.8 V_{\text{RHE}}$  for each M-N-C catalyst. HER barriers are high for Ni and Cu, while  $\text{CO}_2\text{RR}$  is downhill making these materials favorable CO producing catalysts.

## Supplementary Equations

### Faradaic Efficiency

$$FE = \frac{\dot{V} * C * z * F}{R * j_{total}}$$

#### Supplementary Equation 1

*FE*: Faradaic Efficiency of the product / %

$\dot{V}$ : CO<sub>2</sub> gas flow rate / L s<sup>-1</sup>

*C*: Concentration of the product detected by GC / Vol%

*z*: Charge transfer of the product

*F*: Faradaic Constant / C mol<sup>-1</sup>

*R*: Gas Constant / 22.4 L mol<sup>-1</sup>

*j<sub>total</sub>*: Total current during CO<sub>2</sub> bulk electrolysis / A

### CO-mass activity

$$j_{CO} = \frac{FE_{CO} * j_{geo}}{M}$$

#### Supplementary Equation 2

*j<sub>CO</sub>*: CO partial current density based on mass of catalyst / A g<sup>-1</sup>

*FE<sub>CO</sub>*: CO Faradaic Efficiency / %

*j<sub>geo</sub>*: Geometric Current Density / A cm<sup>-2</sup>

*M*: Catalyst loading / g cm<sup>-2</sup>

### CO-geometric activity

$$Geo j_{CO} = \frac{\dot{V} * C * z * F}{R}$$

#### Supplementary Equation 3

*Geo j<sub>CO</sub>*: CO partial current density based on geometric area / mA cm<sup>-2</sup>

$\dot{V}$ : CO<sub>2</sub> gas flow rate / L s<sup>-1</sup>

*C*: Concentration of the product detected by GC / Vol%

*z*: Charge transfer of the product

*F*: Faradaic Constant / C mol<sup>-1</sup>

*R*: Gas Constant / 22.4 L mol<sup>-1</sup>

## Evaluation of CO production turnover frequency

$$TOF = \frac{\dot{V} * C}{R * M * A_{BET} * x_{Metal-N}}$$

### Supplementary Equation 4

*TOF: BET Area and XPS Surface Metal-Nitrogen mole fraction Normalized CO generation rate*

*$\dot{V}$ : CO<sub>2</sub> gas flow rate / L s<sup>-1</sup>*

*C: Concentration of the product detected by GC / Vol%*

*R: Gas Constant / 22.4 L mol<sup>-1</sup>*

*M: Catalyst loading / g m<sup>-2</sup>*

*A<sub>BET</sub>: N<sub>2</sub> physisorption BET surface area/ m<sup>2</sup> g<sup>-1</sup>*

*x<sub>Metal-N</sub>: XPS surface Mole fraction of Metal-Nitrogen*

## Supplementary References

- 1 M.C. Biesinger, B. P. P., L.W.M. Lau, A.R. Gerson, R.St.C. Smart. Resolving surface chemical states in XPS analysis of first row transition metals, oxides and hydroxides: Cr, Mn, Fe, Co and Ni. *Applied Surface Science* **257**, 887-898 (2010).
- 2 S. Muralidharan, R. G. H. Satellite in the x - ray photoelectron spectra of metalloporphyrins. *Journal of Chemical Physics* **71**, 2970-2974 (1979).
- 3 H.W. Nesbitt, D. B. Interpretation of XPS Mn(2p) spectra of Mn oxyhydroxides and constraints on the mechanism of MnO<sub>2</sub> precipitation. *American Mineralogist* **83**, 305-315 (1998).
- 4 Bai, Y. *Photoelectron Spectroscopic Investigations of Porphyrins and Phthalocyanines on Ag(111) and Au(111): Adsorption and Reactivity (Doctoral Dissertation)*, (2010).
